# Supplementary material for: Ultra-simple wearable local sweat volume monitoring patch based on swellable hydrogels
Source: Royal Society of Chemistry journal article supplement (doi:10.1039/c9lc00911f), 2019-12-04

Electronic supplementary material (ESI) for Lab on a Chip.

This journal is © The Royal society of Chemistry.

Fig. S1 patch with calibration feature.

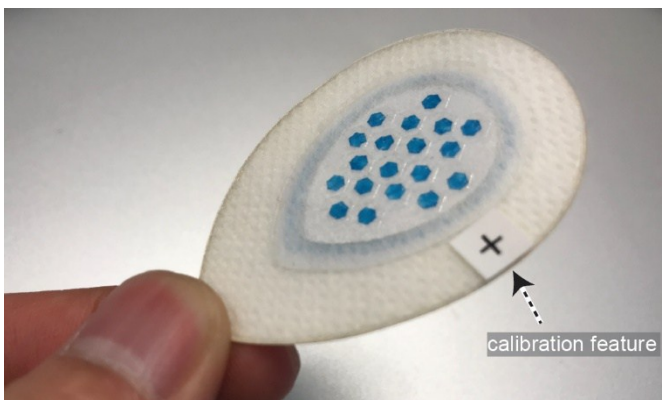

Fig. S2 pH (4-9) exhibits little impact on the ability of the hydrogel to expand.

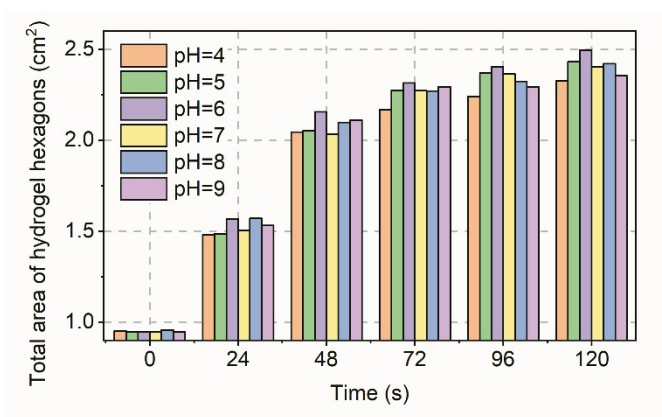

Fig. S3 Increased NaCl concentration (5, 10, 20, 50 and 100 mM) tends to decrease the performance of the hydrogel.

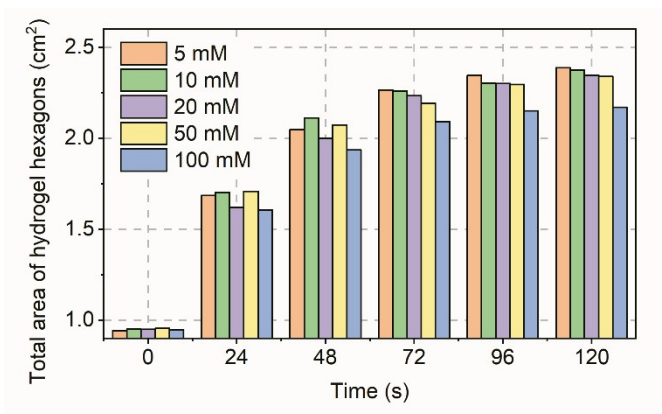

Supplement: c9lc00911f2.pdf [file c9lc00911f2.pdf]
